# Supplementary material for: Compatibility of endoscopic examination using i-scan technology with histopathology results in laryngeal carcinoma: prospective observational study
Source: PeerJ. 2025 Aug 7;13:e19552. doi: 10.7717/peerj.19552 (PMC12335829; doi:10.7717/peerj.19552)
Supplement: Supplemental Information 1 [file peerj-13-19552-s001.xlsx]

## Sheet: Table 1
No	Age	Gender	Histopatology Result	Histopatology classification	WLE	WLE	I-scan	I-Scan	Tumor location	chief complain
1	60	P	Conventional Squamous cell carcinoma poorly differentiated ar laring	malignant	TYPE V	malignant	TYPE V	malignant	glottic	hoarseness
2	52	L	Squamous Cell Carcinoma Moderately Differentiated a.r laring subglottic	malignant	TYPE V	malignant	TYPE V	malignant	supraglottic	dypsnea
3	58	L	Squamous Cell Carcinoma Moderately Differentiated a.r laring (pT3NxMx)	malignant	TYPE V	malignant	TYPE V	malignant	supraglottic	dypsnea
4	71	L	Keratinizing squamous cell carcinoma well differentiated a/r laring	malignant	TYPE II	benign	TYPE II	benign	glottic	hoarseness
5	67	L	Squamous Cell Carcinoma Poorly Differentiated a.r laring	malignant	TYPE V	malignant	TYPE V	malignant	transglottic	dypsnea
6	63	L	Well differentiated squamous cell carcinoma a/r plica vocalis	malignant	TYPE V	malignant	TYPE V	malignant	supraglottic	lump in the neck
7	61	L	Well differentiated squamous cell carcinoma a/r laring	malignant	TYPE V	malignant	TYPE V	malignant	glottic	dypsnea
8	55	L	Squamous Cell Carcinoma Poorly Differentiated a.r laring	malignant	TYPE III	benign	TYPE V	malignant	transglottic	dypsnea
9	22	p	Vocal cord polyp	benign	TYPE 1	benign	TYPE 1	benign	glottic	hoarseness
10	48	P	Squamous Cell Carcinoma Poorly Differentiated a.r laring	malignant	TYPE II	benign	TYPE V	malignant	supraglottic	dypsnea
11	39	L	Squamous Cell Carcinoma Poorly Differentiated a.r laring	malignant	TYPE V	TYPE V	TYPE V	malignant	transglottic	dypsnea
12	71	L	Squamous Cell Carcinoma Moderately Differentiated a.r laring yang telah bermetastasis ke 1 buah kelenjar getah	malignant	TYPE V	malignant	TYPE V	malignant	supraglottic	dysphagia
13	10	L	Squamous Papilloma ar laring	benign	TYPE IV	benign	TYPE IV	benign	glottic	dypsnea
14	5	L	Papilloma a/r laring	benign	TYPE IV	benign	TYPE IV	benign	transglottic	hoarseness
15	55	L	Conventional Squamous cell carcinoma poorly differentiated ar laring	malignant	TYPE V	malignant	TYPE V	malignant	transglottic	dypsnea
16	71	L	Non Keratinizing SCC poorly differentiated subtyoe ar laring	malignant	TYPE II	benign	TYPE IV	benign	transglottic	dypsnea
17	63	L	Well differentiated squamous cell carcinoma a/r laring	malignant	TYPE III	benign	TYPE V	malignant	glottic	hoarseness
18	63	L	Keratinizing squamous cell carcinoma poorly differentiated a/r supraglottic	malignant	TYPE V	malignant	TYPE V	malignant	supraglottic	dypsnea
19	71	L	Well differentiated squamous cell carcinoma a/r laring	malignant	TYPE V	malignant	TYPE V	malignant	transglottic	dypsnea
20	45	L	Non Keratinizing SCC Moderately differentiated subtyoe ar laring supraglottic	malignant	TYPE II	benign	TYPE V	malignant	transglottic	dypsnea
21	32	L	Basaloid Squamous Cell Carcinoma ar laring	malignant	TYPE V	malignant	TYPE V	malignant	transglottic	dypsnea
22	57	L	SCC low grade / well differentiated ar supraglottic	malignant	TYPE IV	benign	TYPE IV	benign	supraglottic	dypsnea
23	46	L	Papillary SCC ar pilica vocalis	malignant	TYPE IV	benign	TYPE V	malignant	transglottic	dypsnea
24	49	L	Vocal cord nodule a.r laryng	benign	TYPE I	benign	TYPE I	benign	glottic	hoarseness
25	66	L	Well differentiated squamous cell carcinoma a/r laring	malignant	TYPE V	malignant	TYPE V	malignant	Transglottic	dypsnea
26	77	L	SCC moderately differentiated ar plica vocalis dextra dan sinistra	malignant	TYPE V	malignant	TYPE V	malignant	transglottic	dypsnea
27	38	L	Squamous Cell Carcinoma Moderately Differentiated a.r laring Suraglottic	malignant	TYPE V	malignant	TYPE IV	malignant	supraglottic	dypsnea
28	45	L	SCC poorly diferentiated a.r laryng	malignant	TYPE II	benign	TYPE V	malignant	transglottic	dypsnea
29	56	L	Keratinizing squamous cell carcinoma	malignant	TYPE V	malignant	TYPE V	malignant	transglottic	dypsnea
